# Supplementary material
Source: PubMed Central journal article supplement (PMC4573450)
Supplement: supp_dev147_dev147supp_figures.pdf [file supp_dev147_dev147supp_figures.pdf]

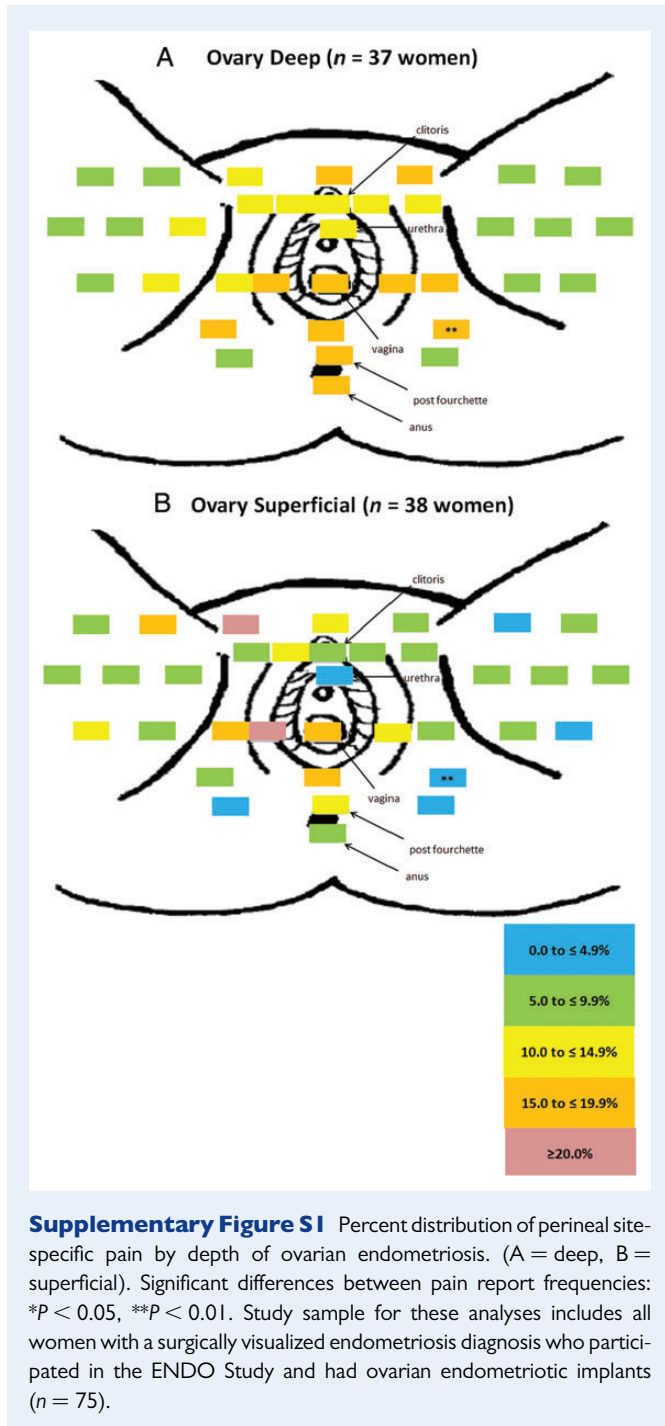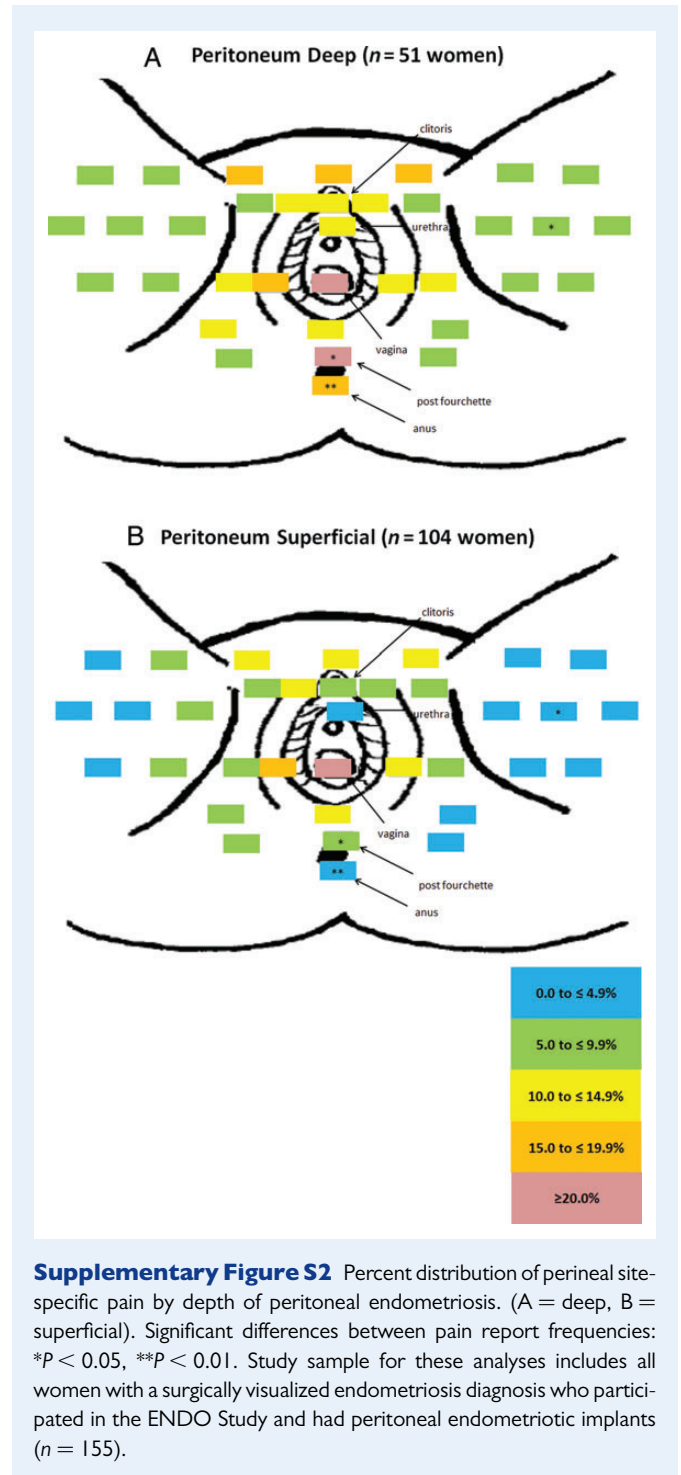

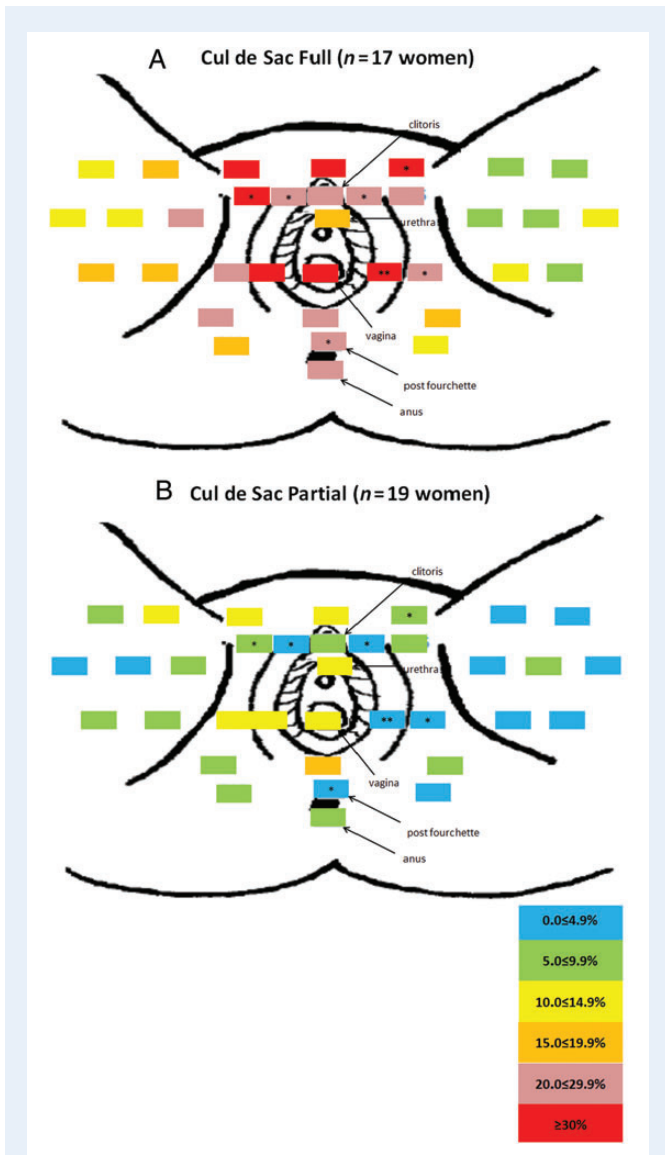

**Supplementary Figure S3** Percent distribution of perineal site-specific pain by extent of cul de sac endometriosis. (A = full, B = partial). Significant differences between pain report frequencies: \* $P < 0.05$ , \*\* $P < 0.01$ . Study sample for these analyses includes all women with a surgically visualized endometriosis diagnosis who participated in the ENDO Study and had cul de sac endometriotic implants ( $n = 36$ ).

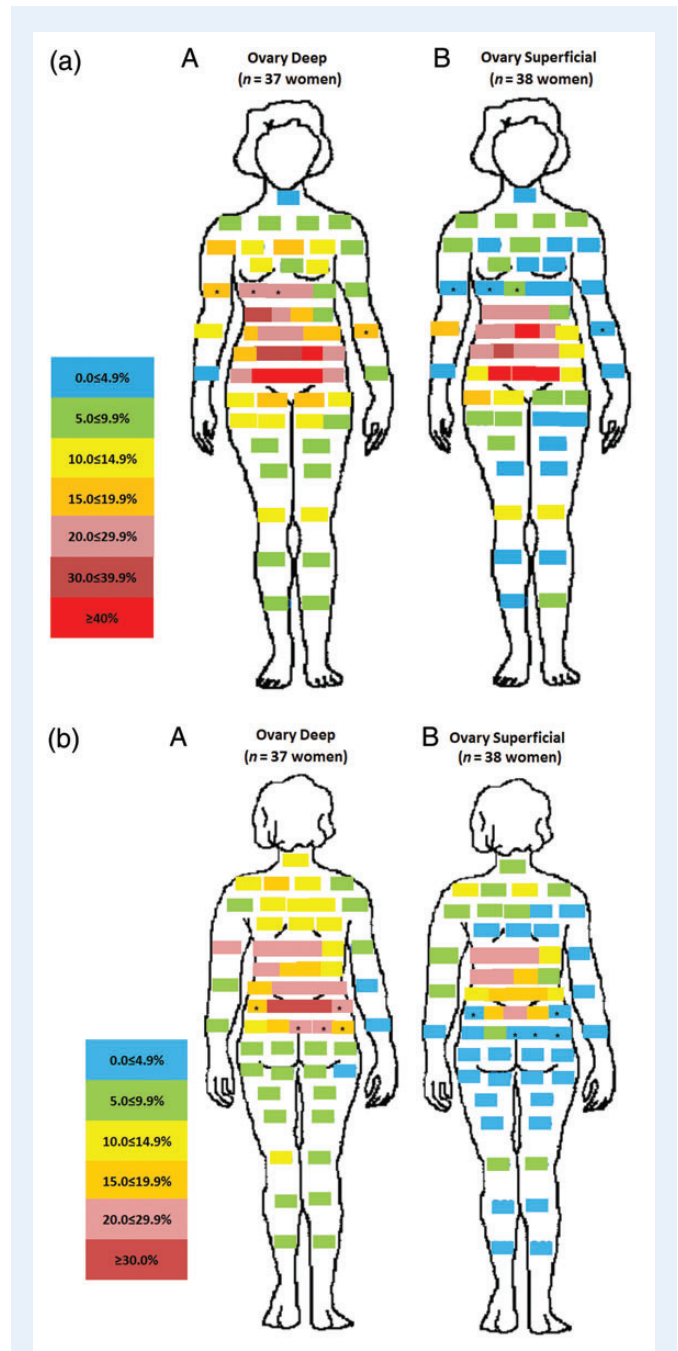

**Supplementary Figure S4** (a) Percent distribution of front body site-specific pain by depth of ovarian endometriosis. (A = deep, B = superficial). Significant differences between pain report frequencies: \* $P < 0.05$ , \*\* $P < 0.01$ . Study sample for these analyses includes all women with a surgically visualized endometriosis diagnosis who participated in the ENDO Study and had ovarian endometriotic implants ( $n = 75$ ). (b) Percent distribution of back body site-specific pain by depth of ovarian endometriosis. (A = deep, B = superficial). Significant differences between pain report frequencies: \* $P < 0.05$ , \*\* $P < 0.01$ . Study sample for these analyses includes all women with a surgically visualized endometriosis diagnosis who participated in the ENDO Study and had ovarian endometriotic implants ( $n = 75$ ).

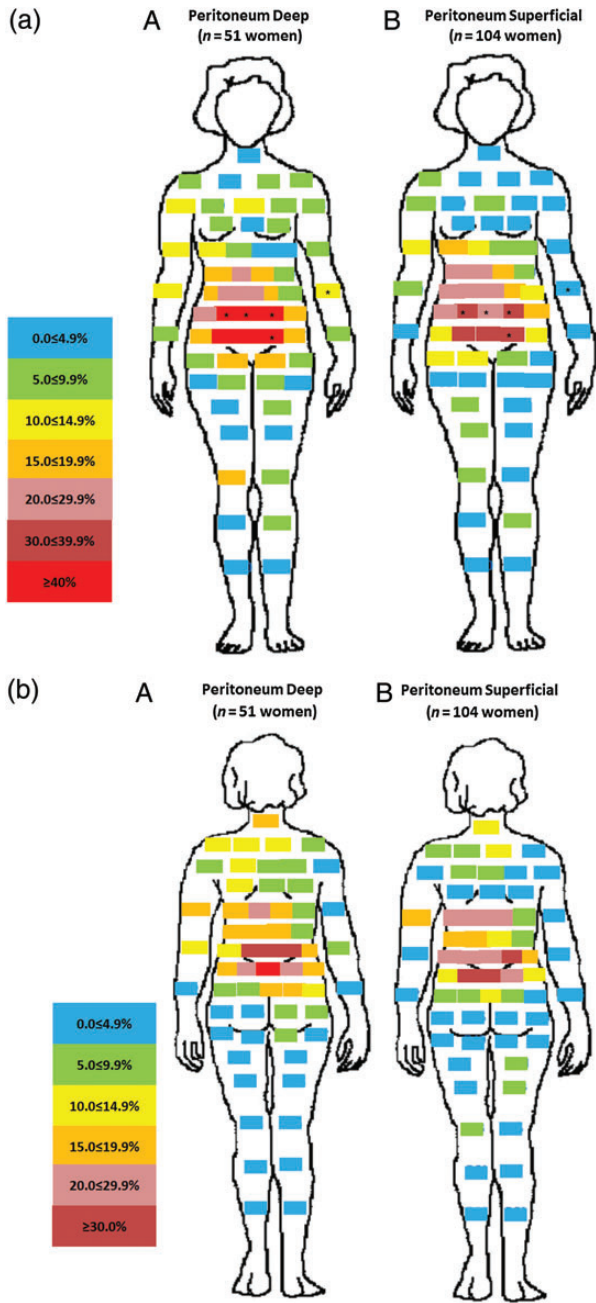

**Supplementary Figure S5** (a) Percent distribution of front body site-specific pain by depth of peritoneal endometriosis. (A = deep, B = superficial). Significant differences between pain report frequencies: \* $P < 0.05$ , \*\* $P < 0.01$ . Study sample for these analyses includes all women with a surgically visualized endometriosis diagnosis who participated in the ENDO Study and had peritoneal endometriotic implants ( $n = 155$ ). (b) Percent distribution of back body site-specific pain by depth of peritoneal endometriosis. (A = deep, B = superficial). Significant differences between pain report frequencies: \* $P < 0.05$ , \*\* $P < 0.01$ . Study sample for these analyses includes all women with a surgically visualized endometriosis diagnosis who participated in the ENDO Study and had peritoneal endometriotic implants ( $n = 155$ ).

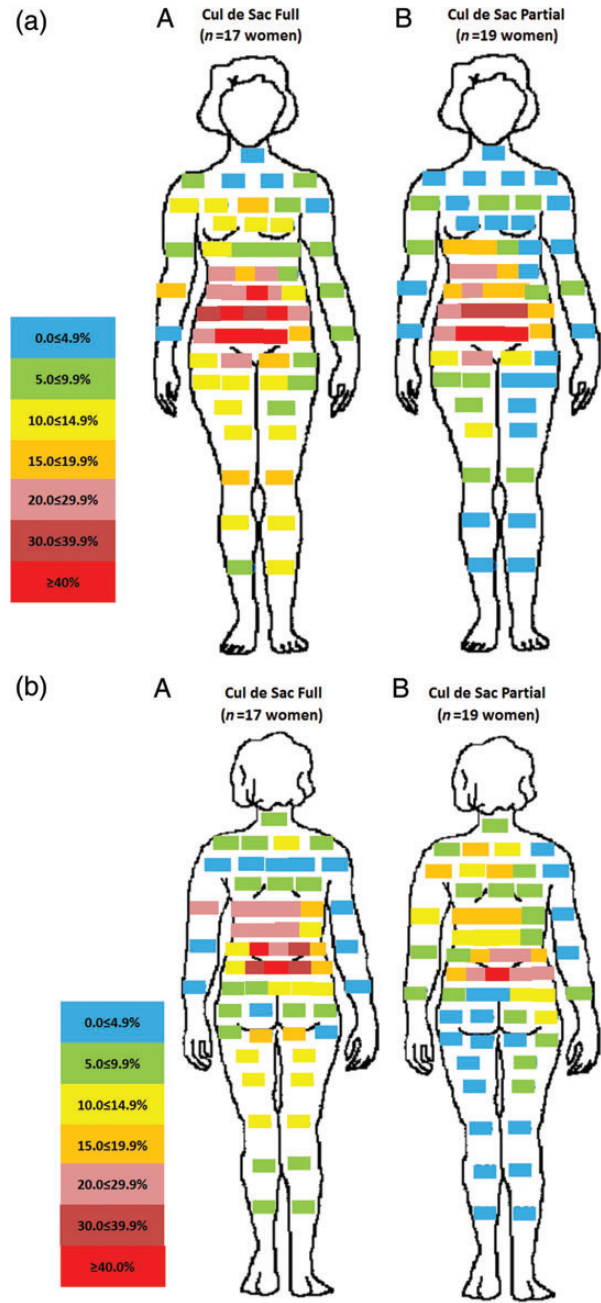

**Supplementary Figure S6** (a) Percent distribution of front body site-specific pain by extent of cul de sac endometriosis. (A = full, B = partial). Significant differences between pain report frequencies: \* $P < 0.05$ , \*\* $P < 0.01$ . Study sample for these analyses includes all women with a surgically visualized endometriosis diagnosis who participated in the ENDO Study and had cul de sac endometriotic implants ( $n = 36$ ). (b) Percent distribution of back body site-specific pain by depth of cul de sac endometriosis. (A = full, B = partial). Significant differences between pain report frequencies: \* $P < 0.05$ , \*\* $P < 0.01$ . Study sample for these analyses includes all women with a surgically visualized endometriosis diagnosis who participated in the ENDO Study and had cul de sac endometriotic implants ( $n = 36$ ).
