# Supplementary material
Source: PubMed Central journal article supplement (PMC4573450)
Supplement: supp_dev147_dev147supp_tables.pdf [file supp_dev147_dev147supp_tables.pdf]

**Supplementary Table SI** Frequency of reports of experiencing increasing numbers of types of pain from 17 different types investigated among women undergoing laparoscopy and/or laparotomy regardless of clinical indication in the ENDO Study (*n* = 473 women).<sup>a</sup>

| Number of different types of pain reported | Frequency | Percent | Cumulative frequency | Cumulative percent |
|--------------------------------------------|-----------|---------|----------------------|--------------------|
| 0                                          | 13        | 2.75    | 13                   | 2.75               |
| 1                                          | 20        | 4.23    | 33                   | 6.98               |
| 2                                          | 28        | 5.92    | 61                   | 12.90              |
| 3                                          | 36        | 7.61    | 97                   | 20.51              |
| 4                                          | 33        | 6.98    | 130                  | 27.48              |
| 5                                          | 43        | 9.09    | 173                  | 36.58              |
| 6                                          | 41        | 8.67    | 214                  | 45.24              |
| 7                                          | 37        | 7.82    | 251                  | 53.07              |
| 8                                          | 45        | 9.51    | 296                  | 62.58              |
| 9                                          | 41        | 8.67    | 337                  | 71.25              |
| 10                                         | 31        | 6.55    | 368                  | 77.80              |
| 11                                         | 23        | 4.86    | 391                  | 82.66              |
| 12                                         | 18        | 3.81    | 409                  | 86.47              |
| 13                                         | 17        | 3.59    | 426                  | 90.06              |
| 14                                         | 18        | 3.81    | 444                  | 93.87              |
| 15                                         | 10        | 2.11    | 454                  | 95.98              |
| 16                                         | 8         | 1.69    | 462                  | 97.67              |
| 17                                         | 11        | 2.33    | 473                  | 100.00             |

<sup>a</sup>No missing observations.

**Supplementary Table SII Pain characteristics of the study sample by endometriosis lesion location.<sup>a</sup>**

| Characteristic (n [%])                                                           | Peritoneum only | Ovary only | Peritoneum and ovary | Peritoneum and cul de sac | Ovary and cul de sac | Peritoneum, ovary and cul de sac | P    |
|----------------------------------------------------------------------------------|-----------------|------------|----------------------|---------------------------|----------------------|----------------------------------|------|
|                                                                                  | 97 (20.5)       | 14 (3.0)   | 33 (7.0)             | 7 (1.5)                   | 10 (2.1)             | 18 (3.8)                         |      |
| <i>Pain type and severity as per visual analog scale<sup>b</sup> (mean ± SD)</i> |                 |            |                      |                           |                      |                                  |      |
| Dyspareunia                                                                      |                 |            |                      |                           |                      |                                  |      |
| Vaginal pain with intercourse                                                    | 2.6 ± 3.1       | 2.7 ± 2.9  | 2.9 ± 3.5            | 1.0 ± 1.7                 | 2.6 ± 3.0            | 2.3 ± 3.0                        | 0.75 |
| Deep pain with intercourse                                                       | 3.2 ± 3.3       | 1.9 ± 2.7  | 3.4 ± 3.8            | 2.4 ± 3.3                 | 1.5 ± 2.7            | 2.7 ± 3.6                        | 0.51 |
| Burning vaginal pain after intercourse                                           | 1.4 ± 2.5       | 1.6 ± 2.9  | 1.5 ± 2.2            | 0.0 ± 0.0                 | 0.9 ± 1.7            | 1.1 ± 2.2                        | 0.38 |
| Pelvic pain lasting hours or days after intercourse                              | 1.6 ± 2.7       | 0.9 ± 2.2  | 2.2 ± 3.4            | 0.0 ± 0.0                 | 0.9 ± 1.7            | 1.0 ± 2.4                        | 0.21 |
| Constant burning vaginal pain (regardless of intercourse)                        | 0.5 ± 1.5       | 0.3 ± 1.1  | 0.5 ± 1.8            | 0.7 ± 1.9                 | 1.0 ± 1.9            | 0.8 ± 2.0                        | 0.70 |
| Dysmenorrhea                                                                     |                 |            |                      |                           |                      |                                  |      |
| Pain just before menstrual period                                                | 3.9 ± 3.3       | 4.3 ± 3.6  | 4.5 ± 2.8            | 3.3 ± 3.5                 | 4.3 ± 4.1            | 4.8 ± 3                          | 0.79 |
| Level of cramps with period                                                      | 6.2 ± 3.4       | 6.9 ± 2.8  | 6.4 ± 2.9            | 7.7 ± 3.5                 | 6.7 ± 3.2            | 6.7 ± 3.1                        | 0.74 |
| Pain after period is over                                                        | 1.4 ± 2.5       | 2.1 ± 3.5  | 2.5 ± 3.2            | 1.6 ± 3                   | 4.3 ± 3.7            | 1.6 ± 3.2                        | 0.08 |
| Ovulatory related pain                                                           |                 |            |                      |                           |                      |                                  |      |
| Pain at ovulation (mid-cycle)                                                    | 3.0 ± 2.9       | 3.6 ± 3.4  | 3.9 ± 3.3            | 1.7 ± 2.4                 | 2.8 ± 3.4            | 2.7 ± 2.8                        | 0.51 |
| Dysuria                                                                          |                 |            |                      |                           |                      |                                  |      |
| Pain with urination                                                              | 0.8 ± 2.0       | 0.4 ± 1.1  | 1.6 ± 2.5            | 0.0 ± 0.0                 | 1.3 ± 2.8            | 0.8 ± 2.5                        | 0.23 |
| Dyschezia                                                                        |                 |            |                      |                           |                      |                                  |      |
| Pain with bowel elimination                                                      | 1.9 ± 2.9       | 2.3 ± 2.7  | 2.3 ± 2.7            | 1.9 ± 3.8                 | 1.8 ± 3.2            | 3.0 ± 3.3                        | 0.60 |
| Other pain                                                                       |                 |            |                      |                           |                      |                                  |      |
| Pain in groin when lifting                                                       | 1.1 ± 2.2       | 1.5 ± 2.7  | 1.1 ± 1.8            | 1.1 ± 2                   | 1.1 ± 1.9            | 1.0 ± 2.6                        | 0.95 |
| Pain when bladder is full                                                        | 2.1 ± 2.7       | 1.4 ± 2.7  | 2.8 ± 2.9            | 0.7 ± 1.9                 | 3.1 ± 2.8            | 1.6 ± 2.7                        | 0.07 |
| Abdominal pain                                                                   | 2.6 ± 3.3       | 3.1 ± 3.5  | 3.0 ± 3.3            | 2.1 ± 3.9                 | 2.3 ± 3              | 2.3 ± 3.4                        | 0.87 |
| Low back pain                                                                    | 4.4 ± 3.1       | 3.1 ± 3    | 2.9 ± 3              | 4.1 ± 4.9                 | 2.7 ± 3.4            | 2.7 ± 3.3                        | 0.06 |
| Muscle/joint pain                                                                | 2.9 ± 3.2       | 2.8 ± 3.6  | 1.9 ± 2.6            | 3.2 ± 4.1                 | 1.7 ± 2.3            | 2.0 ± 3.1                        | 0.53 |
| Migraine headache                                                                | 3.7 ± 3.9       | 2.3 ± 3.3  | 3.2 ± 3.7            | 4.8 ± 4.2                 | 2.1 ± 2.7            | 1.9 ± 3                          | 0.28 |

<sup>a</sup>Includes 180 women in the ENDO operative cohort with lesion location completed on ASRM checklist (N.B., there was one woman with cul de sac only lesions, and due to low frequency, chose to exclude from table). Missing 0 observations for chronic pain, 0 for cyclic pain, 0 for pain type and 14 for pain medications. Statistical significance for differences was assessed via Wilcoxon signed-rank tests. Values sharing a common superscript are significantly different  $P < 0.05$  via multiple comparison tests (Dwass, Steel, Critchlow-Fligner procedure [based on pairwise two-sample rankings] for means).

<sup>b</sup>11-point visual analog scale with 0 being no pain and 10 being the most severe pain imaginable, women reported any pain in the last 6 months (no minimum duration required). Mean ± SD for pain on original VAS scale (0 to 10).

**Supplementary Table SIII Pain characteristics of the study sample by endometriosis lesion location.<sup>a</sup>**

| Characteristic (n [%])                                    | Peritoneum only | Ovary only | Peritoneum and ovary | Peritoneum and cul de sac | Ovary and cul de sac | Peritoneum, ovary and cul de sac | P    |
|-----------------------------------------------------------|-----------------|------------|----------------------|---------------------------|----------------------|----------------------------------|------|
|                                                           | 97 (20.5)       | 14 (3.0)   | 33 (7.0)             | 7 (1.5)                   | 10 (2.1)             | 18 (3.8)                         |      |
| <i>Chronic/cyclic pain (n [%])</i>                        |                 |            |                      |                           |                      |                                  |      |
| Chronic pelvic pain                                       | 57 (58.8)       | 7 (50.0)   | 13 (39.4)            | 6 (85.7)                  | 5 (50.0)             | 10 (55.6)                        | 0.24 |
| Cyclic pelvic pain                                        | 49 (50.5)       | 7 (50.0)   | 15 (45.5)            | 4 (57.1)                  | 4 (40.0)             | 11 (61.1)                        | 0.89 |
| <i>Pain type<sup>b</sup> (n [%])</i>                      |                 |            |                      |                           |                      |                                  |      |
| Dyspareunia                                               |                 |            |                      |                           |                      |                                  |      |
| Vaginal pain with intercourse                             | 56 (57.7)       | 9.0 (64.3) | 18 (54.6)            | 2 (28.6)                  | 5 (50.0)             | 9 (50.0)                         | 0.69 |
| Deep pain with intercourse                                | 57 (58.8)       | 7 (50.0)   | 17 (51.5)            | 3 (42.9)                  | 3 (30.0)             | 9 (50.0)                         | 0.57 |
| Burning vaginal pain after intercourse                    | 32 (33.0)       | 5 (35.7)   | 16 (48.5)            | 0 (0.0)                   | 3 (30.0)             | 6 (33.3)                         | 0.24 |
| Pelvic pain lasting hours or days after intercourse       | 33 (34.0)       | 4 (28.6)   | 14 (42.4)            | 0 (0.0)                   | 3 (30.0)             | 3 (16.7)                         | 0.21 |
| Constant burning vaginal pain (regardless of intercourse) | 12 (12.4)       | 1 (7.1)    | 4 (12.1)             | 1 (14.3)                  | 3 (30.0)             | 3 (16.7)                         | 0.68 |
| Dysmenorrhea                                              |                 |            |                      |                           |                      |                                  |      |
| Pain just before menstrual period                         | 70 (72.2)       | 10 (71.4)  | 27 (81.8)            | 5 (71.4)                  | 7 (70.0)             | 16 (88.9)                        | 0.64 |
| Level of cramps with period                               | 85 (87.6)       | 14 (100.0) | 31 (93.9)            | 6 (85.7)                  | 9 (90.0)             | 17 (94.4)                        | 0.64 |
| Pain after period is over                                 | 33 (34.0)       | 6 (42.9)   | 15 (45.5)            | 2 (28.6)                  | 7 (70.0)             | 4 (22.2)                         | 0.15 |
| Ovulatory related pain                                    |                 |            |                      |                           |                      |                                  |      |
| Pain at ovulation (mid-cycle)                             | 65 (67.0)       | 10 (71.4)  | 24 (72.7)            | 3 (42.9)                  | 6 (60.0)             | 12 (66.7)                        | 0.75 |
| Dysuria                                                   |                 |            |                      |                           |                      |                                  |      |
| Pain with urination                                       | 21 (21.7)       | 2 (14.3)   | 12 (36.4)            | 0 (0)                     | 2 (20.0)             | 3 (16.7)                         | 0.25 |
| Dyschezia                                                 |                 |            |                      |                           |                      |                                  |      |
| Pain with bowel elimination                               | 38 (39.2)       | 8 (57.1)   | 17 (51.5)            | 2 (28.6)                  | 3 (30.0)             | 10 (55.6)                        | 0.40 |
| Other pain                                                |                 |            |                      |                           |                      |                                  |      |
| Pain in groin when lifting                                | 22 (22.7)       | 4 (28.6)   | 10 (30.3)            | 2 (28.6)                  | 3 (30.0)             | 3 (16.7)                         | 0.89 |
| Pain when bladder is full                                 | 54 (55.7)       | 4 (28.6)   | 20 (60.6)            | 1 (14.3)                  | 8 (80.0)             | 7 (38.9)                         | 0.02 |
| Abdominal pain                                            | 46 (47.4)       | 9 (64.3)   | 18 (54.6)            | 2 (28.6)                  | 6 (60.0)             | 8 (44.4)                         | 0.61 |
| Low back pain                                             | 81 (83.5)       | 10 (71.4)  | 20 (60.6)            | 4 (57.1)                  | 5 (50.0)             | 10 (55.6)                        | 0.01 |
| Muscle/joint pain                                         | 53 (57.6)       | 6 (46.2)   | 14 (42.4)            | 3 (60.0)                  | 5 (50.0)             | 7 (38.9)                         | 0.56 |
| Migraine headache                                         | 54 (57.5)       | 6 (46.2)   | 16 (48.5)            | 4 (66.7)                  | 5 (50.0)             | 6 (35.3)                         | 0.57 |
| <i>Pain medications<sup>c</sup> (n [%])</i>               |                 |            |                      |                           |                      |                                  |      |
| Over-the counter pain medications                         | 74 (84.1)       | 13 (7.8)   | 29 (90.6)            | 4 (66.7)                  | 9 (100.0)            | 17 (100.0)                       | 0.13 |
| Narcotic prescription medications                         | 25 (28.4)       | 4 (30.8)   | 12 (37.5)            | 2 (33.3)                  | 2 (22.2)             | 2 (11.8)                         | 0.64 |
| Non-narcotic prescription medications                     | 19 (21.6)       | 1 (7.7)    | 6 (18.8)             | 1 (16.7)                  | 0 (0.0)              | 2 (11.8)                         | 0.62 |
| None                                                      | 6 (6.8)         | 0 (0.0)    | 1 (3.1)              | 1 (16.7)                  | 0 (0.0)              | 0 (0.0)                          | 0.57 |

<sup>a</sup>Includes 180 women in the ENDO operative cohort with lesion location completed on ASRM checklist form (N.B., there was only one woman with cul de sac only lesions, thus chose to exclude from table). Missing 0 observations for chronic pain, 0 for cyclic pain, 0 for pain type and 24 for pain medications. Statistical significance for differences was assessed via chi-square or Fisher's exact tests; the Tukey procedure for multiple comparisons (Elliott and Reisch, 2006).

<sup>b</sup>11-point visual analog scale with 0 being no pain and 10 being the most severe pain imaginable (n [%] is for any woman indicating experiencing any of the 17 types of pain (i.e. VAS > 0 versus no pain, VAS = 0).

<sup>c</sup>Pain medications taken on at least a monthly basis for any indication in the past 12 months.

**Supplementary Table SIV Pain characteristics by ovarian lesion depth.<sup>a</sup>**

| Characteristic                                               | Deep<br>(n = 37) |           | Superficial<br>(n = 38) |           | P                |                      |
|--------------------------------------------------------------|------------------|-----------|-------------------------|-----------|------------------|----------------------|
| <i>Chronic/cyclic pain (n [%])</i>                           |                  |           |                         |           |                  |                      |
| Chronic pelvic pain                                          | 15 (40.5)        |           | 25 (65.8)               |           | 0.03             |                      |
| Cyclic pelvic pain                                           | 18 (48.6)        |           | 20 (52.6)               |           | 0.73             |                      |
| <i>Pain type and severity<sup>b</sup> (n [%]; mean ± SD)</i> |                  |           |                         |           | <i>P (n [%])</i> | <i>P (mean ± SD)</i> |
| <i>Dyspareunia</i>                                           |                  |           |                         |           |                  |                      |
| Vaginal pain with intercourse                                | 19 (51.4)        | 2.2 ± 2.7 | 22 (57.9)               | 3.2 ± 3.5 | 0.57             | 0.26                 |
| Deep pain with intercourse                                   | 17 (45.0)        | 2.4 ± 3.1 | 19 (50.0)               | 3.0 ± 3.8 | 0.73             | 0.55                 |
| Burning vaginal pain after intercourse                       | 10 (27.0)        | 0.8 ± 1.7 | 20 (52.6)               | 1.8 ± 2.6 | 0.02             | 0.02                 |
| Pelvic pain lasting hours or days after intercourse          | 6 (16.2)         | 0.5 ± 1.3 | 18 (47.4)               | 2.6 ± 3.5 | 0.004            | 0.001                |
| Constant burning vaginal pain                                | 5 (13.5)         | 0.5 ± 1.6 | 6 (15.8)                | 0.7 ± 1.8 | 0.78             | 0.81                 |
| <i>Dysmenorrhea</i>                                          |                  |           |                         |           |                  |                      |
| Pain just before menstrual period                            | 30 (49.3)        | 4.1 ± 2.7 | 30 (79.0)               | 4.9 ± 3.5 | 0.82             | 0.22                 |
| Level of cramps with period                                  | 36 (97.3)        | 6.2 ± 2.7 | 35 (92.1)               | 6.9 ± 3.1 | 0.32             | 0.12                 |
| Pain after period is over                                    | 12 (32.4)        | 1.8 ± 3.2 | 20 (52.6)               | 3.1 ± 3.5 | 0.08             | 0.08                 |
| <i>Ovulatory related pain</i>                                |                  |           |                         |           |                  |                      |
| Pain at ovulation (mid-cycle)                                | 23 (62.2)        | 2.3 ± 2.7 | 29 (76.3)               | 4.4 ± 3.3 | 0.18             | 0.01                 |
| <i>Dysuria</i>                                               |                  |           |                         |           |                  |                      |
| Pain with urination                                          | 8 (21.6)         | 1.0 ± 2.4 | 11 (29.0)               | 1.2 ± 2.3 | 0.47             | 0.49                 |
| <i>Dyschezia</i>                                             |                  |           |                         |           |                  |                      |
| Pain with bowel elimination                                  | 19 (51.4)        | 2.6 ± 3.1 | 19 (50.0)               | 2.2 ± 2.7 | 0.91             | 0.74                 |
| <i>Other pain</i>                                            |                  |           |                         |           |                  |                      |
| Pain in groin when lifting                                   | 9 (24.3)         | 1.1 ± 2.2 | 11 (29.0)               | 1.2 ± 2.2 | 0.65             | 0.64                 |
| Pain when bladder is full                                    | 17 (46.0)        | 1.7 ± 2.7 | 22 (57.9)               | 2.9 ± 2.9 | 0.30             | 0.08                 |
| Abdominal pain                                               | 17 (46.0)        | 2.2 ± 3.3 | 24 (63.2)               | 3.3 ± 3.2 | 0.13             | 0.11                 |
| Low back pain                                                | 23 (62.2)        | 3.2 ± 3.5 | 22 (57.9)               | 2.5 ± 2.6 | 0.71             | 0.48                 |
| Muscle/joint pain                                            | 16 (43.2)        | 2.2 ± 3.0 | 16 (43.2)               | 1.9 ± 2.6 | 1.0              | 0.88                 |
| Migraine headache                                            | 15 (41.7)        | 2.5 ± 3.5 | 18 (48.9)               | 2.6 ± 3.3 | 0.54             | 0.72                 |
| <i>Pain medications<sup>c</sup> (n [%])</i>                  |                  |           |                         |           |                  |                      |
| Over-the counter pain medications                            | 33 (97.1)        |           | 35 (94.6)               |           | 1.00             |                      |
| Narcotic prescription medications                            | 7 (20.6)         |           | 13 (35.1)               |           | 0.17             |                      |
| Non-narcotic prescription medications                        | 5 (14.7)         |           | 4 (10.8)                |           | 0.62             |                      |
| None                                                         | 0 (0.0)          |           | 1 (2.7)                 |           | 0.33             |                      |

<sup>a</sup>Includes 75 women in the ENDO operative cohort with ovarian lesions reported via ASRM checklist form. Missing 0 observations for chronic pain, 0 for cyclic pain, 0 for pain type and 4 for pain medications. Statistical significance for differences was assessed via Wilcoxon signed-rank tests for continuous variables and chi-square or Fisher's exact tests for categorical variables.

<sup>b</sup>11-point visual analog scale with 0 being no pain and 10 being the most severe pain imaginable, women reported any pain in the last 6 months (no minimum duration required). Mean ± SD for pain on original VAS scale (0 to 10).

<sup>c</sup>Pain medications taken on at least a monthly basis for any indication in the past 12 months.

**Supplementary Table SV Pain characteristics by peritoneal lesion depth.<sup>a</sup>**

| Characteristic                                               | Deep<br>(n = 51) |           | Superficial<br>(n = 104) |           | P                |                      |
|--------------------------------------------------------------|------------------|-----------|--------------------------|-----------|------------------|----------------------|
| <i>Chronic/cyclic pain (n [%])</i>                           |                  |           |                          |           |                  |                      |
| Chronic pelvic pain                                          | 24 (47.1)        |           | 45 (43.3)                |           | 0.66             |                      |
| Cyclic pelvic pain                                           | 26 (51.0)        |           | 50 (48.1)                |           | 0.73             |                      |
| <i>Pain type and severity<sup>b</sup> (n [%]; mean ± SD)</i> |                  |           |                          |           |                  |                      |
|                                                              |                  |           |                          |           | <i>P (n [%])</i> | <i>P (mean ± SD)</i> |
| <i>Dyspareunia</i>                                           |                  |           |                          |           |                  |                      |
| Vaginal pain with intercourse                                | 29 (56.9)        | 2.8 ± 3.3 | 56 (53.9)                | 2.5 ± 3.0 | 0.72             | 0.59                 |
| Deep pain with intercourse                                   | 30 (58.8)        | 3.0 ± 3.3 | 56 (53.9)                | 3.2 ± 3.5 | 0.56             | 0.93                 |
| Burning vaginal pain after intercourse                       | 19 (37.3)        | 1.4 ± 2.3 | 35 (33.7)                | 1.3 ± 2.3 | 0.66             | 0.61                 |
| Pelvic pain lasting hours or days after intercourse          | 18 (35.3)        | 1.7 ± 2.9 | 32 (30.8)                | 1.5 ± 2.8 | 0.57             | 0.63                 |
| Constant burning vaginal pain                                | 8 (15.7)         | 0.6 ± 1.7 | 12 (11.5)                | 0.5 ± 1.6 | 0.47             | 0.47                 |
| <i>Dysmenorrhea</i>                                          |                  |           |                          |           |                  |                      |
| Pain just before menstrual period                            | 40 (78.4)        | 4.3 ± 3.0 | 78 (75.0)                | 4.0 ± 3.2 | 0.64             | 0.53                 |
| Level of cramps with period                                  | 48 (94.1)        | 6.8 ± 3.1 | 91 (87.5)                | 6.2 ± 3.3 | 0.20             | 0.28                 |
| Pain after period is over                                    | 18 (35.3)        | 1.6 ± 2.8 | 36 (34.6)                | 1.7 ± 2.8 | 0.93             | 0.96                 |
| <i>Ovulatory related pain</i>                                |                  |           |                          |           |                  |                      |
| Pain at ovulation (mid-cycle)                                | 38 (74.5)        | 3.3 ± 2.9 | 66 (63.5)                | 3.0 ± 3.0 | 0.17             | 0.43                 |
| <i>Dysuria</i>                                               |                  |           |                          |           |                  |                      |
| Pain with urination                                          | 13 (25.5)        | 1.1 ± 2.3 | 23 (22.1)                | 0.9 ± 2.0 | 0.64             | 0.65                 |
| <i>Dyschezia</i>                                             |                  |           |                          |           |                  |                      |
| Pain with bowel elimination                                  | 31 (60.8)        | 3.1 ± 3.3 | 36 (34.6)                | 1.6 ± 2.6 | 0.002            | 0.002                |
| <i>Other pain</i>                                            |                  |           |                          |           |                  |                      |
| Pain in groin when lifting                                   | 13 (25.5)        | 1.2 ± 2.2 | 24 (23.1)                | 1.0 ± 2.1 | 0.74             | 0.70                 |
| Pain when bladder is full                                    | 32 (62.8)        | 2.5 ± 2.8 | 50 (48.1)                | 2.0 ± 2.7 | 0.09             | 0.13                 |
| Abdominal pain                                               | 25 (49.0)        | 2.5 ± 3.1 | 49 (47.1)                | 2.7 ± 3.4 | 0.83             | 0.92                 |
| Low back pain                                                | 33 (64.7)        | 3.8 ± 3.6 | 82 (78.9)                | 3.9 ± 3.1 | 0.06             | 0.62                 |
| Muscle/joint pain                                            | 27 (52.9)        | 2.6 ± 3.0 | 50 (51.6)                | 2.6 ± 3.1 | 0.87             | 0.93                 |
| Migraine headache                                            | 21 (42.0)        | 2.5 ± 3.3 | 59 (59.0)                | 3.9 ± 3.9 | 0.05             | 0.03                 |
| <i>Pain medications<sup>c</sup> (n [%])</i>                  |                  |           |                          |           |                  |                      |
| Over-the counter pain medications                            | 46 (93.9)        |           | 78 (83.0)                |           | 0.08             |                      |
| Narcotic prescription medications                            | 14 (28.6)        |           | 27 (28.7)                |           | 1.00             |                      |
| Non-narcotic prescription medications                        | 11 (22.5)        |           | 17 (18.1)                |           | 0.53             |                      |
| None                                                         | 1 (2.0)          |           | 7 (7.4)                  |           | 0.26             |                      |

<sup>a</sup>Includes 155 women in the ENDO operative cohort with peritoneal lesions reported via ASRM checklist form. Missing 0 observations for chronic pain, 0 for cyclic pain, 0 for pain type and 12 for pain medications. Statistical significance for differences was assessed via Wilcoxon signed-rank tests for continuous variables and chi-square or Fisher's exact tests for categorical variables.

<sup>b</sup>11-point visual analog scale with 0 being no pain and 10 being the most severe pain imaginable, women reported any pain in the last 6 months (no minimum duration required). Mean ± SD for pain on original VAS scale (0 to 10).

<sup>c</sup>Pain medications taken on at least a monthly basis for any indication in the past 12 months.

**Supplementary Table SVI Pain characteristics by cul de sac lesion extent.<sup>a</sup>**

| Characteristic                                               | Full<br>(n = 17) |           | Partial<br>(n = 19) |           | P                |                      |
|--------------------------------------------------------------|------------------|-----------|---------------------|-----------|------------------|----------------------|
| <i>Chronic/cyclic pain (n [%])</i>                           |                  |           |                     |           |                  |                      |
| Chronic pelvic pain                                          | 8 (47.1)         |           | 6 (31.6)            |           | 0.34             |                      |
| Cyclic pelvic pain                                           | 9 (52.9)         |           | 7 (36.8)            |           | 0.33             |                      |
| <i>Pain type and severity<sup>b</sup> (n [%]; mean ± SD)</i> |                  |           |                     |           | <i>P (n [%])</i> | <i>P (mean ± SD)</i> |
| <i>Dyspareunia</i>                                           |                  |           |                     |           |                  |                      |
| Vaginal pain with intercourse                                | 7 (41.2)         | 2.1 ± 3.2 | 10 (52.6)           | 2.4 ± 2.4 | 0.49             | 0.56                 |
| Deep pain with intercourse                                   | 6 (35.3)         | 2.1 ± 3.6 | 10 (52.6)           | 2.6 ± 2.9 | 0.30             | 0.46                 |
| Burning vaginal pain after intercourse                       | 5 (29.4)         | 1.1 ± 2.3 | 4 (21.1)            | 0.5 ± 1.2 | 0.56             | 0.53                 |
| Pelvic pain lasting hours or days after intercourse          | 3 (17.7)         | 1.1 ± 2.5 | 4 (21.1)            | 0.7 ± 1.5 | 0.80             | 1.00                 |
| Constant burning vaginal pain                                | 2 (11.8)         | 0.6 ± 1.7 | 6 (31.6)            | 1.1 ± 2.0 | 0.15             | 0.21                 |
| <i>Dysmenorrhea</i>                                          |                  |           |                     |           |                  |                      |
| Pain just before menstrual period                            | 12 (70.6)        | 3.7 ± 3.6 | 17 (89.5)           | 5.0 ± 3.0 | 0.15             | 0.21                 |
| Level of cramps with period                                  | 15 (88.2)        | 6.5 ± 3.3 | 18 (94.7)           | 7.1 ± 3.1 | 0.48             | 0.53                 |
| Pain after period is over                                    | 7 (41.2)         | 3.2 ± 4.1 | 6 (31.6)            | 1.4 ± 2.5 | 0.55             | 0.28                 |
| <i>Ovulatory related pain</i>                                |                  |           |                     |           |                  |                      |
| Pain at ovulation (mid-cycle)                                | 9 (52.9)         | 2.4 ± 3.3 | 13 (68.4)           | 2.8 ± 2.4 | 0.34             | 0.32                 |
| <i>Dysuria</i>                                               |                  |           |                     |           |                  |                      |
| Pain with urination                                          | 2 (11.8)         | 1.0 ± 2.9 | 3 (15.8)            | 0.6 ± 1.6 | 0.73             | 0.87                 |
| <i>Dyschezia</i>                                             |                  |           |                     |           |                  |                      |
| Pain with bowel elimination                                  | 7 (41.2)         | 2.5 ± 3.5 | 9 (47.4)            | 2.4 ± 3.2 | 0.71             | 0.92                 |
| <i>Other pain</i>                                            |                  |           |                     |           |                  |                      |
| Pain in groin when lifting                                   | 4 (23.5)         | 1.2 ± 2.7 | 5 (26.3)            | 1.1 ± 1.8 | 0.85             | 0.88                 |
| Pain when bladder is full                                    | 8 (47.1)         | 2.1 ± 3.1 | 9 (47.4)            | 1.9 ± 2.5 | 0.99             | 1.00                 |
| Abdominal pain                                               | 8 (47.1)         | 2.4 ± 3.5 | 9 (47.4)            | 2.1 ± 3.1 | 0.99             | 0.88                 |
| Low back pain                                                | 11 (64.7)        | 4.0 ± 3.8 | 8 (42.1)            | 1.9 ± 3.2 | 0.18             | 0.10                 |
| Muscle/joint pain                                            | 8 (50.0)         | 2.7 ± 3.3 | 7 (38.9)            | 1.4 ± 2.5 | 0.51             | 0.32                 |
| Migraine headache                                            | 7 (43.8)         | 2.4 ± 3.1 | 8 (44.4)            | 2.4 ± 3.4 | 0.97             | 1.00                 |
| <i>Pain medications<sup>c</sup> (n [%])</i>                  |                  |           |                     |           |                  |                      |
| Over-the counter pain medications                            | 15 (100)         |           | 16 (88.9)           |           | 0.18             |                      |
| Narcotic prescription medications                            | 4 (26.7)         |           | 2 (11.1)            |           | 0.37             |                      |
| Non-narcotic prescription medications                        | 1 (6.7)          |           | 2 (11.1)            |           | 1.00             |                      |
| None                                                         | 0 (0.0)          |           | 1 (5.6)             |           | 1.00             |                      |

<sup>a</sup>Includes 36 women in the ENDO operative cohort with cul de sac lesions reported via ASRM checklist form. Missing 0 observations for chronic pain, 0 for cyclic pain, 0 for pain type and 3 for pain medications. Statistical significance for differences was assessed via Wilcoxon signed-rank tests for continuous variables and chi-square or Fisher's exact tests for categorical variables.

<sup>b</sup>11-point visual analog scale with 0 being no pain and 10 being the most severe pain imaginable, women reported any pain in the last 6 months (no minimum duration required). Mean ± SD for pain on original VAS scale (0 to 10).

<sup>c</sup>Pain medications taken on at least a monthly basis for any indication in the past 12 months.

**Supplementary Table SVII Pain characteristics by endometriosis status among subfertile women.<sup>a</sup>**

| Characteristic                                               | Subfertile (n = 164) |           |                  |           | P         |               |
|--------------------------------------------------------------|----------------------|-----------|------------------|-----------|-----------|---------------|
|                                                              | Endo (n = 94)        |           | No Endo (n = 70) |           | P (n [%]) | P (mean ± SD) |
| <i>Chronic/cyclic pain (n [%])</i>                           |                      |           |                  |           |           |               |
| Chronic pelvic pain                                          | 37 (39.4)            |           | 27 (38.6)        |           | 0.92      |               |
| Cyclic pelvic pain                                           | 48 (51.1)            |           | 19 (27.1)        |           | 0.002     |               |
| <i>Pain type and severity<sup>b</sup> (n [%]; mean ± SD)</i> |                      |           |                  |           |           |               |
| Dyspareunia                                                  |                      |           |                  |           |           |               |
| Vaginal pain with intercourse                                | 50 (53.2)            | 2.2 ± 2.7 | 28 (40.0)        | 1.7 ± 2.7 | 0.09      | 0.17          |
| Deep pain with intercourse                                   | 49 (52.1)            | 2.5 ± 3.0 | 26 (37.1)        | 2.2 ± 3.2 | 0.06      | 0.23          |
| Burning vaginal pain after intercourse                       | 35 (37.2)            | 1.3 ± 2.2 | 20 (28.6)        | 0.9 ± 1.9 | 0.25      | 0.20          |
| Pelvic pain lasting hours or days after intercourse          | 30 (31.9)            | 1.4 ± 2.5 | 14 (20.0)        | 1.2 ± 2.6 | 0.09      | 0.18          |
| Constant burning vaginal pain (regardless of intercourse)    | 11 (11.7)            | 0.4 ± 1.4 | 5 (7.1)          | 0.3 ± 1.3 | 0.33      | 0.35          |
| Dysmenorrhea                                                 |                      |           |                  |           |           |               |
| Pain just before menstrual period                            | 71 (75.5)            | 4.1 ± 3.1 | 42 (60.0)        | 2.7 ± 2.9 | 0.03      | 0.004         |
| Level of cramps with period                                  | 88 (93.6)            | 6.5 ± 3.1 | 59 (84.3)        | 4.7 ± 3.3 | 0.05      | < 0.001       |
| Pain after period is over                                    | 94 (35.1)            | 1.5 ± 2.6 | 19 (27.1)        | 1.2 ± 2.3 | 0.28      | 0.34          |
| Ovulatory related pain                                       |                      |           |                  |           |           |               |
| Pain at ovulation (mid-cycle)                                | 62 (66.0)            | 3.0 ± 3.0 | 32 (45.7)        | 2.1 ± 2.9 | 0.01      | 0.02          |
| <b>Subfertile (n = 164)</b>                                  |                      |           |                  |           |           |               |
| Characteristic                                               | Endo (n = 94)        |           | No Endo (n = 70) |           | P         |               |
|                                                              |                      |           |                  |           | P (n [%]) | P (mean ± SD) |
| Dysuria                                                      |                      |           |                  |           |           |               |
| Pain with urination                                          | 15 (16.0)            | 0.6 ± 1.8 | 11 (15.7)        | 0.6 ± 1.7 | 0.97      | 0.98          |
| Pain with bowel elimination                                  | 46 (48.9)            | 2.2 ± 2.8 | 21 (30.0)        | 1.2 ± 2.3 | 0.01      | 0.01          |
| Pain in groin when lifting                                   | 21 (22.3)            | 0.9 ± 1.9 | 16 (22.9)        | 1.0 ± 2.3 | 0.94      | 0.86          |
| Pain when bladder is full                                    | 39 (41.5)            | 1.6 ± 2.4 | 34 (48.6)        | 1.9 ± 2.6 | 0.37      | 0.34          |
| Abdominal pain                                               | 40 (42.6)            | 0.6 ± 1.8 | 28 (40.0)        | 0.6 ± 1.7 | 0.74      | 0.73          |
| Low back pain                                                | 63 (67.0)            | 3.4 ± 3.2 | 50 (71.4)        | 3.5 ± 3.1 | 0.55      | 0.64          |
| Muscle/joint pain                                            | 40 (43.5)            | 2.1 ± 3.0 | 34 (50.8)        | 2.0 ± 2.7 | 0.36      | 0.75          |
| Migraine headache                                            | 45 (49.5)            | 3.1 ± 3.7 | 36 (53.7)        | 3.6 ± 3.8 | 0.59      | 0.49          |
| <i>Pain medications<sup>c</sup> (n [%])</i>                  |                      |           |                  |           |           |               |
| Over-the counter pain medications                            | 76 (88.4)            |           | 45 (81.8)        |           | 0.28      |               |
| Narcotic prescription medications                            | 14 (16.3)            |           | 13 (23.6)        |           | 0.28      |               |
| Non-narcotic prescription medications                        | 14 (16.3)            |           | 9 (16.4)         |           | 0.99      |               |
| None                                                         | 5 (5.8)              |           | 3 (5.5)          |           | 0.93      |               |

<sup>a</sup>Includes 164 women in the ENDO operative cohort who reported having tried longer than 6 months or more to get pregnant, regardless of whether they actually got pregnant. Missing 0 observations for chronic pain, 0 for cyclic pain, 0 for pain type and 23 for pain medications. Statistical significance for differences was assessed via Wilcoxon signed-rank tests for continuous variables and chi-square or Fisher's exact tests for categorical variables.

<sup>b</sup>11-point visual analog scale with 0 being no pain and 10 being the most severe pain imaginable, women reported any pain in the last 6 months (no minimum duration required). Mean ± SD for pain on original VAS scale (0 to 10).

<sup>c</sup>Pain medications taken on at least a monthly basis for any indication in the past 12 months.

## Reference

Elliott A, Reisch J. Implementing a multiple comparison test for proportions in a 2xc crosstabulation in SAS. *Proceedings of the 31st Annual SAS Users Group*

*International Conference, San Francisco, California.* Cary, NC: SAS Institute Inc 2006. 26–29 March 2006. Paper 204–31. Available from: <http://www2.sas.com/proceedings/sugi31/204-31.pdf>.
